# Supplementary material
Source: Royal Society of Chemistry journal article supplement (doi:10.1039/d6bm00185h)

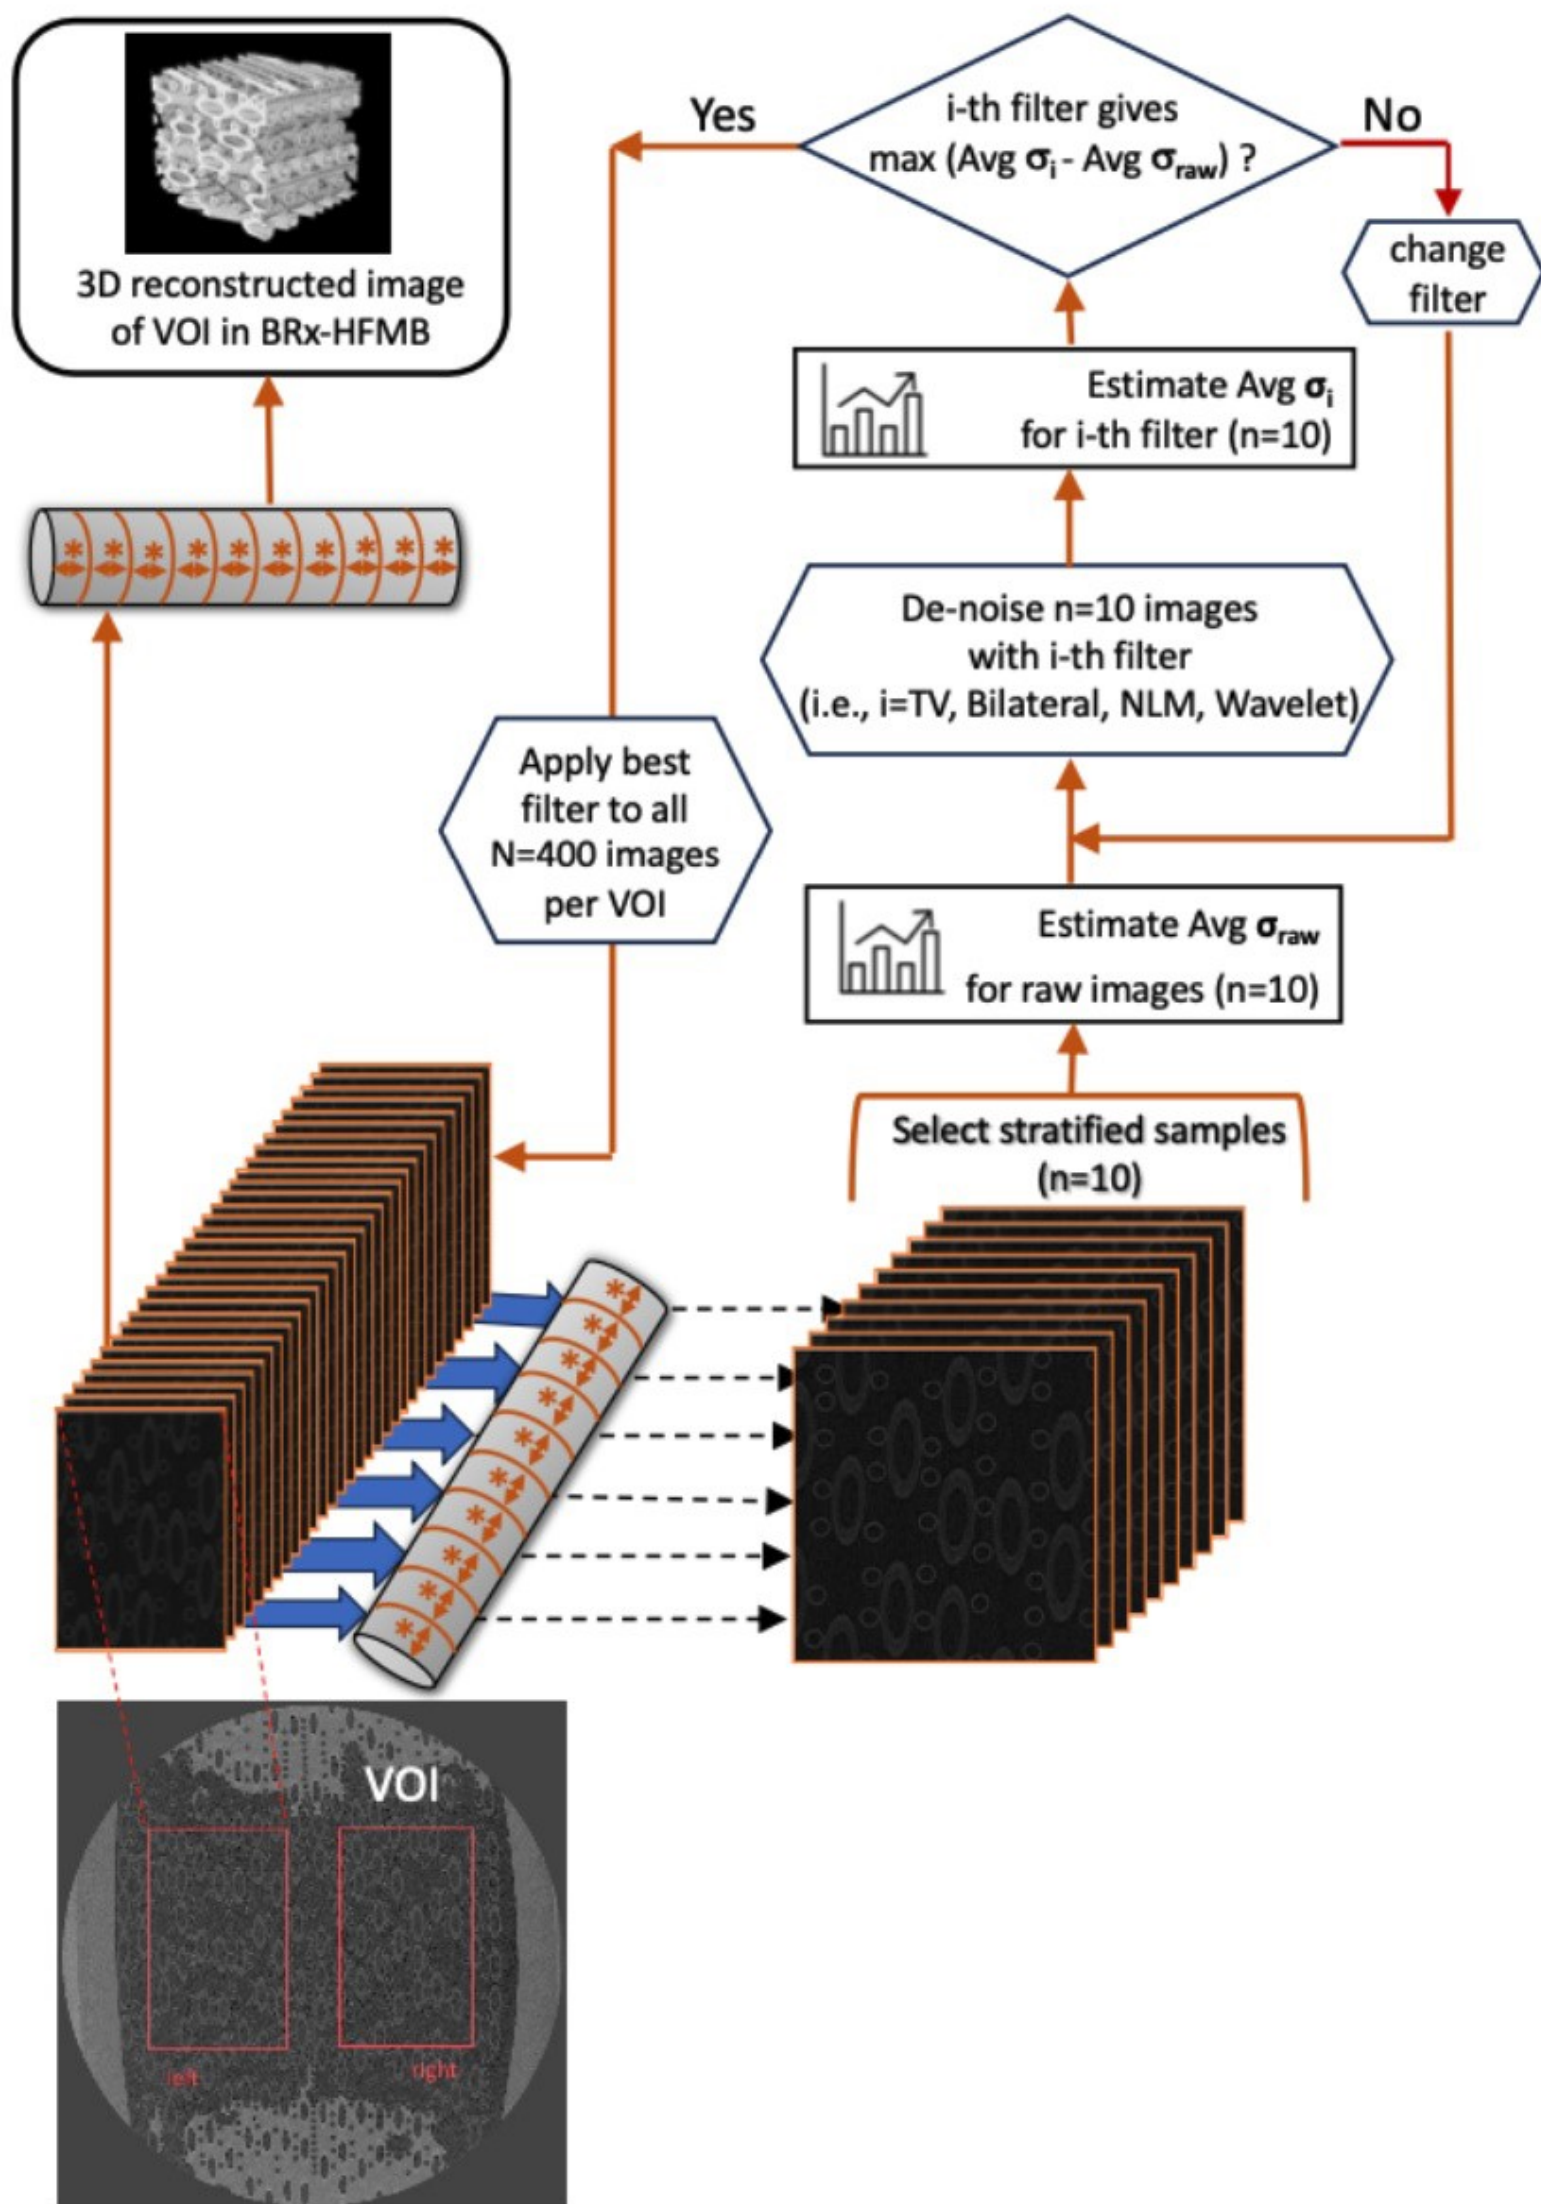

Supplement: d6bm00185h2.pdf [file d6bm00185h2.pdf]
